# Supplementary material for: CircTP63 promotes hepatocellular carcinoma progression by sponging miR-155-5p and upregulating ZBTB18
Source: Research Square preprint supplement (doi:10.21203/rs.3.rs-63585/v3), 2021-01-04

**Supplementary Figure 1** for the circTP63 mRNA level in SK-hep1 and SUN-387 after treatment by RNase R in Figure 1.

**
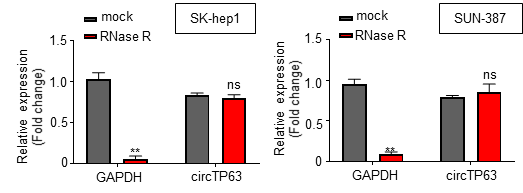
**

**Supplementary Figure 2** for the morphological analysis of SK-hep1 and SUN-387 cells after si-circTP63 in Figure 2.


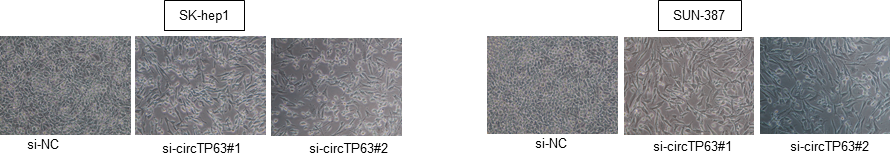


**Supplementary Figure 3** for the rescue experiment for the circTP63 siRNAs in RT-qPCR (A), Cell viability (B), Cell migration and invasion (C), and Colony formation (D) assays.

**
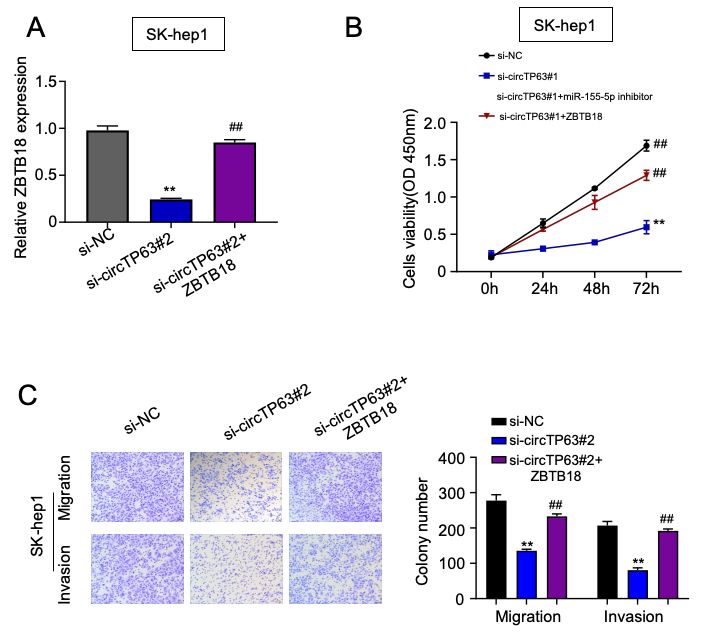
**

**Supplementary Figure 4** for Tumor volumes and weights of Hep3B cells with circTP63 overexpression xenograft nude models.


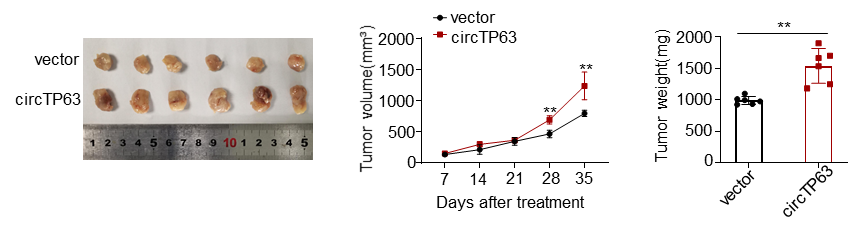


**Supplementary Figure 5** for the EMT biomarker analysis in SK-hep1 and SUN-387 cells transfected with si-NC, si-circTP63#1, si-circTP63#1 + miR-155-5p inhibitor or si-circTP63#1 + pcDNA3.1-ZBTB18.


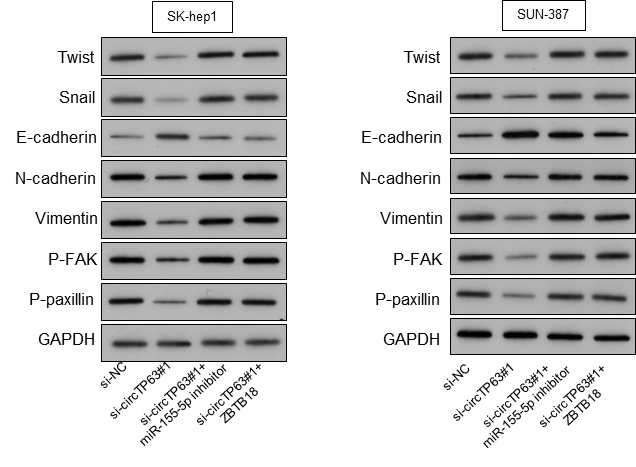

Supplement: Supplementary file 1 [file fe3da49afc09646baed77b5c.docx]
